# Supplementary material
Source: MDPI journal article supplement (https://www.mdpi.com/2073-4395/13/4/1130)
Supplement: s1 [file s1]

**Supplemental table S1 Primers in the experiment**

| Primer name  | Primer sequence(5'-3')     | Usage                                                           |
|--------------|----------------------------|-----------------------------------------------------------------|
| Rc 1-Forward | GGCAGGGGCGGGAAAGGCGCAAG    | <i>Rc\rc</i> Construction of target site                        |
| Rc 1-Reverse | AAACCTTGCGCCTTTCCCGCCCC    |                                                                 |
| Rc 2-Forward | GGCACCAACCATGTGCTGAAAGAG   |                                                                 |
| Rc 2-Reverse | AAACCTCTTTCAGCACATGGTTGG   |                                                                 |
| pRGEb32-3-F  | CTGGGTACGTTGGAAACCAC       | Colony PCR verification for pRGEb32 vector                      |
| pRGEb32-3-R  | CGGCCCAAATTGAAAAGATA       |                                                                 |
| Hpt-F        | TACACAGGCCATCGGTCCAGA      | Hygromycin gene detection                                       |
| Hpt-R        | TAGGAGGGCGTGGATATGTC       |                                                                 |
| Cas9-3-F     | TCCTGGAAAAGATGGACGGC       | Cas9 sequence detection                                         |
| Cas9-3-R     | ATCCGCTCGATGAAGCTCTG       |                                                                 |
| UBI-1-F      | ACGGAGACAAACGGCATCTT       | UBI Promoter sequence detection                                 |
| UBI-1-R      | AGGAGAGGAGAAGCAGCGTA       |                                                                 |
| Rc-Test-5F   | TCAAAAGCACCCCTTGTTCCA      | Sequencing to verify target site sequence for <i>Rc\rc</i> gene |
| Rc-Test-5R   | TGGTTGGCACTGAAATCACC       |                                                                 |
| Rc-Test-6F   | CTGAAGGAAGTGATGACAACAAGACC |                                                                 |
| Rc-Test-6R   | CTAGATTCATGCTGCCATTAGTGAGG |                                                                 |
| 1-off-F      | GTCGTAAAGGTGCATGTTAT       | Off-target detection                                            |
| 1-off-R      | GCGATCTGGATGGGAAGG         |                                                                 |
| 2-off-F      | CAACTGACATTGACCACCAG       |                                                                 |
| 2-off-R      | TCACAGGGCTTAGCGAGA         |                                                                 |
| M13(-47)     | CGCCAGGGTTTTCCAGTCACGAC    | Bi-allele mutation sequencing primer for pMD19-T vector         |
| M13(-48)     | CACACAGGAAACAGCTATGAC      |                                                                 |

**Supplemental Table S2 Potential off-target site detection**

| Name of putative off-target sites | Putative off-target locus | Putative off-target sequence | No. of mismatch bases | No. of plants examined | No. of indel mutation |
|-----------------------------------|---------------------------|------------------------------|-----------------------|------------------------|-----------------------|
| 1-off                             | Chr1: 20008744            | GGgAGGGGaGGGAAGGCGgAgGCGG    | 4                     | 4                      | 0                     |
| 2-off                             | Chr11: 3952492            | GGCAaGGcCGGGgAAGGCGCAAtCGG   | 4                     | 4                      | 0                     |

Note: Two potential off-target sites were screened through the CRISPR RGEN Tools website (<http://www.rgenome.net/>). Lower case bases are supposed mismatched bases.

**Supplemental table S3 Potential off-target sequencing primers**

| Putative off-target locus | Forward primer sequence | Reverse primer sequence |
|---------------------------|-------------------------|-------------------------|
| Chr1: 20008744            | GTCGTAAAGGTGCATGTTAT    | GCGATCTGGATGGGAAGG      |
| Chr11: 3952492            | CAACTGACATTGACCACCAG    | TCACAGGGCTTAGCGAGA      |

Note: Sequencing primers were designed for the two potential off-target sites.

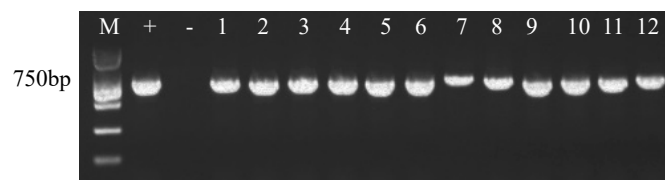

**Supplemental Figure S1 Construction of CRISPR/Cas9-Rc mutation vector**

Note: “M” refers to D2000 marker; “+” refers to the plasmid as positive control; “-” refers to ddH<sub>2</sub>O as negative control; 1-6 refers to pRGEB32-Rc 1 monoclonal bacteria, and 7-12 refers to the pRGEB32-Rc 2 monoclonal bacteria, respectively.

|                 |                                                                   |
|-----------------|-------------------------------------------------------------------|
| gRNA spacer-Rc1 | .....GGCAGGGGCGGGAAAGGCGCAAG.....                                 |
| pRGEB32 Rc 1    | AAGAGTTGTGCAGATGATCCGTGGCAGGGGCGGGAAAGGCGCAAGGTTTTAGAGCTAGAAATAG  |
| pRGEB32         | AAGAGTTGTGCAGATGATCCGTGGCAGGAGACCGAGG...TCTCGGTTTTAGAGCTAGAAATAG  |
| gRNA spacer-Rc2 | .....GGCACCAACCATGTGCTGAAAGAG.....                                |
| pRGEB32 Rc 2    | AAGAGTTGTGCAGATGATCCGTGGCACCAACCATGTGCTGAAAGAGGTTTTAGAGCTAGAAATAG |
| pRGEB32         | AAGAGTTGTGCAGATGATCCGTGGCAGGAGACCGAGGTCT...CGGTTTTAGAGCTAGAAATAG  |

**Supplemental Figure S2 Sequence alignment of pRGEB32-Rc mutation vector  
and the original plasmid pRGEB32**

Note: “gRNA spacer-Rc 1” and “gRNA spacer-Rc 2” refer to target site 1 and 2 on *Rc* gene, respectively.

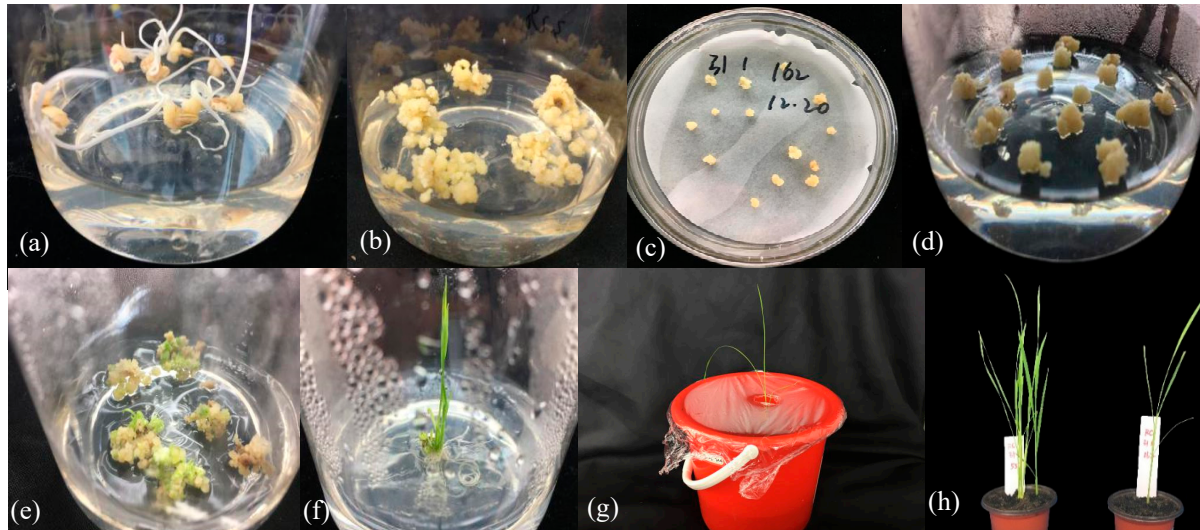

**Supplemental Figure S3 Genetic transformation of *Agrobacterium tumefaciens* using seed mature embryo**

Note: (a): induced callus;(b): callus subculture; (c): Co-culture of *Agrobacterium* and callus after *Agrobacterium* infection; (d): screening of callus on hygromycin medium; (e): callus differentiation on hygromycin medium; (f): rooting culture; (g): domestication in the barrel; (h): plantlets.

|                    |                                |                          |                             |
|--------------------|--------------------------------|--------------------------|-----------------------------|
| 1-off              | .....                          | CGGCCTCCGCCTTCCCTCCCTCCG | .....                       |
| Reference sequence | CGCCTTCGCCCTCTCTCAAACCCCTAGCCT | CGGCCTCCGCCTTCCCTCCCTCCG | CGTCGCGGGCGCCTCCGCCGCCGCGTC |
| Rc 1-162-1         | CGCCTTCGCCCTCTCTCAAACCCCTAGCCT | CGGCCTCCGCCTTCCCTCCCTCCG | CGTCGCGGGCGCCTCCGCCGCCGCGTC |
| Rc 2-162-16        | CGCCTTCGCCCTCTCTCAAACCCCTAGCCT | CGGCCTCCGCCTTCCCTCCCTCCG | CGTCGCGGGCGCCTCCGCCGCCGCGTC |
| Rc 2-162-17        | CGCCTTCGCCCTCTCTCAAACCCCTAGCCT | CGGCCTCCGCCTTCCCTCCCTCCG | CGTCGCGGGCGCCTCCGCCGCCGCGTC |
| Rc 1-162-18        | CGCCTTCGCCCTCTCTCAAACCCCTAGCCT | CGGCCTCCGCCTTCCCTCCCTCCG | CGTCGCGGGCGCCTCCGCCGCCGCGTC |

  

|                    |                                  |                        |                              |
|--------------------|----------------------------------|------------------------|------------------------------|
| 2-off              | .....                            | TTGCGCCTTCCCCGGCCTTGCC | .....                        |
| Reference sequence | AATCTCGACGATAATGTTGCCTCCCTCGCCGA | TTGCGCCTTCCCCGGCCTTGCC | CTCATCAGAAGGCGCCAATGGTGCCAGT |
| Rc 1-162-1         | AATCTCGACGATAATGTTGCCTCCCTCGCCGA | TTGCGCCTTCCCCGGCCTTGCC | CTCATCAGAAGGCGCCAATGGTGCCAGT |
| Rc 2-162-16        | AATCTCGACGATAATGTTGCCTCCCTCGCCGA | TTGCGCCTTCCCCGGCCTTGCC | CTCATCAGAAGGCGCCAATGGTGCCAGT |
| Rc 2-162-17        | AATCTCGACGATAATGTTGCCTCCCTCGCCGA | TTGCGCCTTCCCCGGCCTTGCC | CTCATCAGAAGGCGCCAATGGTGCCAGT |
| Rc 1-162-18        | AATCTCGACGATAATGTTGCCTCCCTCGCCGA | TTGCGCCTTCCCCGGCCTTGCC | CTCATCAGAAGGCGCCAATGGTGCCAGT |

### Supplemental Figure S4 Potential off-target sequence alignment

Note: No off-target was found in sequencing alignment, indicating that the target site of *Rc* gene was specific.
